# Supplementary material
Source: publisher figshare collection journal article supplement (https://frontiersin.figshare.com/ndownloader/files/24714512)
Supplement: Supplementary file [file 24714512]

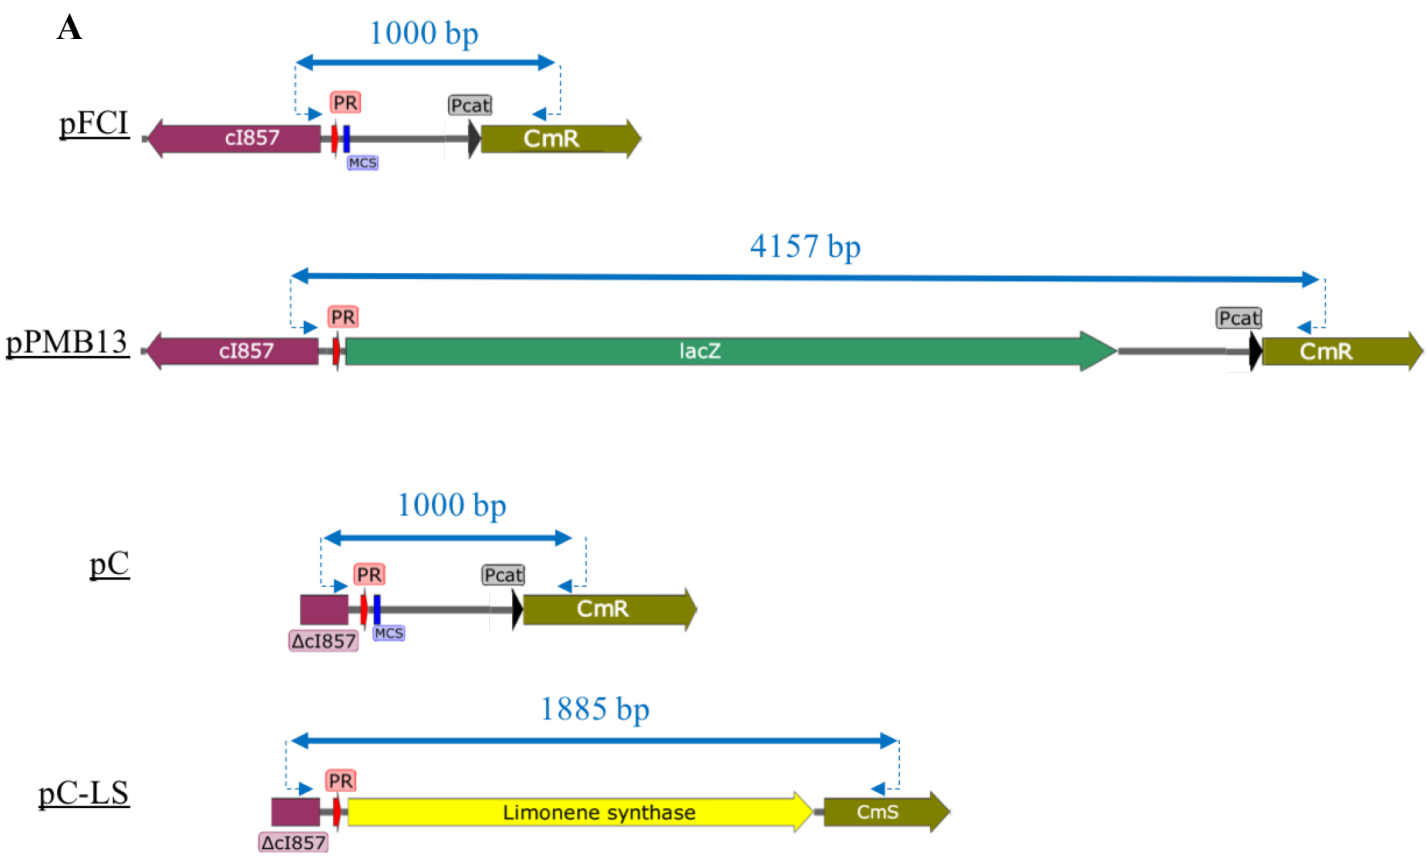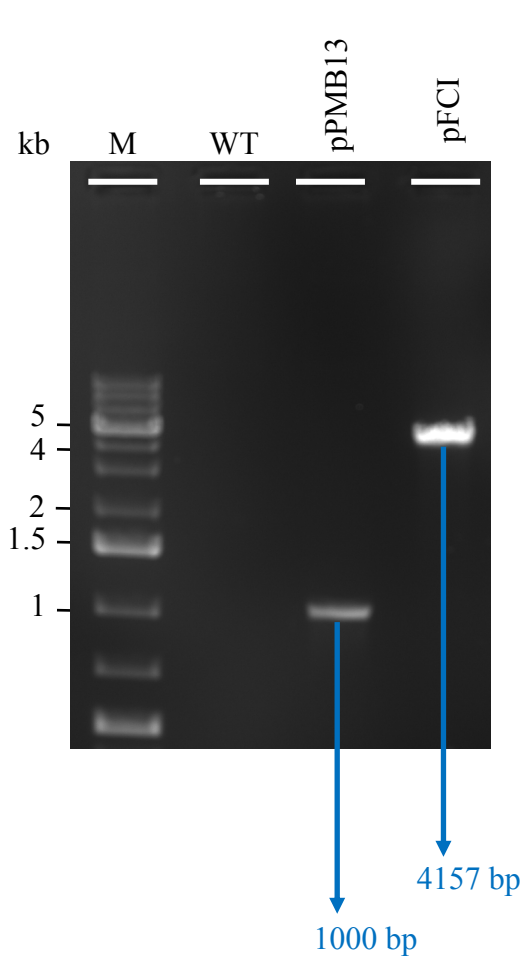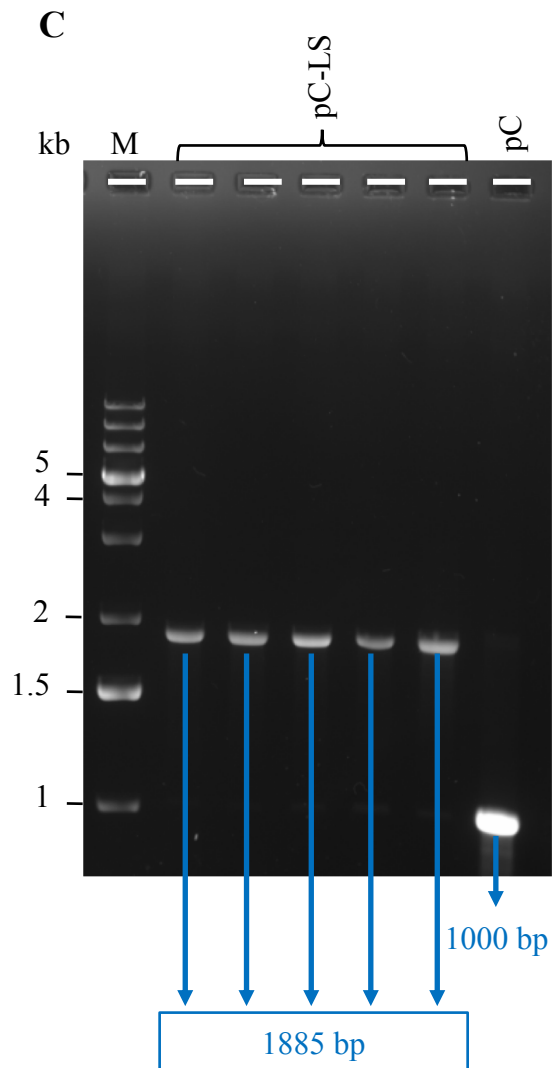

**Supplementary Figure S3. Schematic representation and PCR analysis of the pFCI-plasmid family replicating in *Cyanotheca* PCC 7425**

(A) Schematic representation of the pFCI plasmid and its derivatives. The genes are represented by colored arrows pointing into the direction of their transcription. The PCR primers are colored in blue and their corresponding PCR are indicated by double arrows. Typical UV-light image of the agarose gel showing the relevant PCR products from pFCI and pPMB13 (B); pC and pCLS (C). M (marker DNA) indicates the GeneRuler 1 kb Plus DNA Ladder (Thermo Scientific).
